# Supplementary material
Source: MDPI journal article supplement (https://www.mdpi.com/2073-4344/11/8/881)
Supplement: s1 [file s1]

# Alcohol Oxidation Assisted by Molybdenum Hydrazonato Catalysts Employing Hydroperoxide Oxidants

Josipa Mihalinec <sup>1</sup>, Matea Pajski <sup>1</sup>, Pascal Guillo <sup>2,3</sup>, Mirna Mandarić <sup>1</sup>, Nikol Bebić <sup>1</sup>, Jana Pisk <sup>1,\*</sup> and Višnja Vrdoljak <sup>1,\*</sup>

<sup>1</sup> Faculty of Science, Department of Chemistry, University of Zagreb, Horvatovac 102a, 10000 Zagreb, Croatia; josipa.mihalinec@chem.pmf.hr (J.M.); matea.pajski@chem.pmf.hr (M.P.); mirna.mandacic@chem.pmf.hr (M.M.); nikol.bebic@chem.pmf.hr (N.B.)

<sup>2</sup> Department of Chemistry, Institut Universitaire de Technologie Paul Sabatier, University of Toulouse, Av. G. Pompidou, BP20258, F-81104 Castres CEDEX, France; pascal.guillo@iut-tlse3.fr

<sup>3</sup> LCC-CNRS, Université de Toulouse, CNRS, UPS, Toulouse, France

\* Correspondence: jana.pisk@chem.pmf.hr (J.P.); visnja@chem.pmf.hr (V.V.); Tel.: +385-1-4606-350 (J.P.); +385-1-4606-353 (V.V.)

## Table of content :

|                                                                                                  |    |
|--------------------------------------------------------------------------------------------------|----|
| Crystal and molecular structure of $[\text{MoO}_2(\text{L}^3)]_n \cdot \text{H}_2\text{O}$ ..... | 2  |
| IR-ATR spectra of $[\text{MoO}_2(\text{L}^{1-4})]_n$ .....                                       | 3  |
| IR-ATR spectra of $[\text{MoO}_2(\text{L}^{1-4})(\text{MeOH})]$ .....                            | 5  |
| NMR spectroscopy of $[\text{MoO}_2(\text{L})]_n$ .....                                           | 7  |
| Visual presentation of catalytic results .....                                                   | 10 |
| Carveol oxidation – discussion part .....                                                        | 11 |

## Crystal and molecular structure of [MoO<sub>2</sub>(L<sup>3</sup>)]<sub>n</sub>·H<sub>2</sub>O

**Table S1.** Selected bond lengths (Å) and angles (°) for **3·H<sub>2</sub>O**.

| bond lengths<br>(Å) |           |
|---------------------|-----------|
| Mo1–O1              | 1.723(2)  |
| Mo1–O2              | 1.694(2)  |
| Mo1–O3              | 1.933(2)  |
| Mo1–O4              | 2.019(2)  |
| Mo1–N1              | 2.219(2)  |
| Mo1–N3              | 2.427(2)  |
| C1–N1               | 1.294(4)  |
| C2–N2               | 1.291(4)  |
| N1–N2               | 1.395(3)  |
| angles<br>(°)       |           |
| O1–Mo1–O2           | 106.3(1)  |
| O1–Mo1–O3           | 105.13(9) |
| O1–Mo1–O4           | 95.32(9)  |
| O1–Mo1–N1           | 160.93(9) |
| O1–Mo1–N3           | 83.69(9)  |
| O2–Mo1–O3           | 97.60(9)  |
| O2–Mo1–O4           | 99.33(9)  |
| O2–Mo1–N1           | 90.05(9)  |
| O2–Mo1–N3           | 169.96(9) |
| O3–Mo1–O4           | 148.51(8) |
| O3–Mo1–N1           | 81.71(8)  |
| O3–Mo1–N3           | 80.22(8)  |
| O4–Mo1–N1           | 71.94(8)  |
| O4–Mo1–N3           | 78.50(8)  |
| N1–Mo1–N3           | 79.94(8)  |

**Table S2.** Geometry of intermolecular hydrogen bonds (Å, °) for [MoO<sub>2</sub>(L)]<sub>n</sub>·H<sub>2</sub>O (**3·H<sub>2</sub>O**)

| D–H...A                   | D–H / Å | H...A / Å | D...A / Å | D–H...A / ° |
|---------------------------|---------|-----------|-----------|-------------|
| O5–H5...O1 <sup>a</sup>   | 0.84    | 1.93      | 2.770(3)  | 175.5       |
| C12–H12...N2 <sup>b</sup> | 0.95    | 2.40      | 3.311(4)  | 160.6       |
| C1–H1...O5 <sup>c</sup>   | 0.95    | 2.65      | 3.368(4)  | 132.3       |

<sup>a</sup> x, 1/2–y, 1/2+z; <sup>b</sup> –x–1/2, y–1/2, z; <sup>c</sup> –x–1/2, y+1/2, z

## IR-ATR spectra of $[\text{MoO}_2(\text{L}^{1-4})]_n$

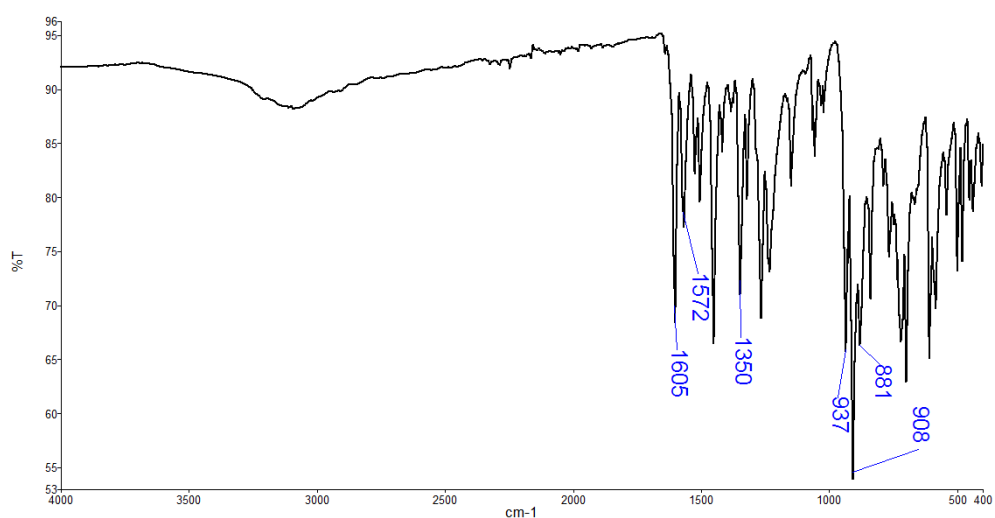

(a)

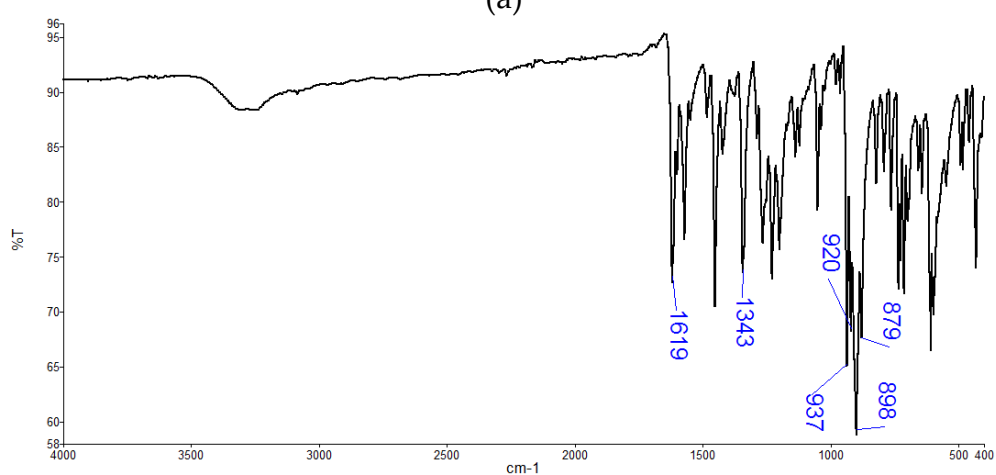

(b)

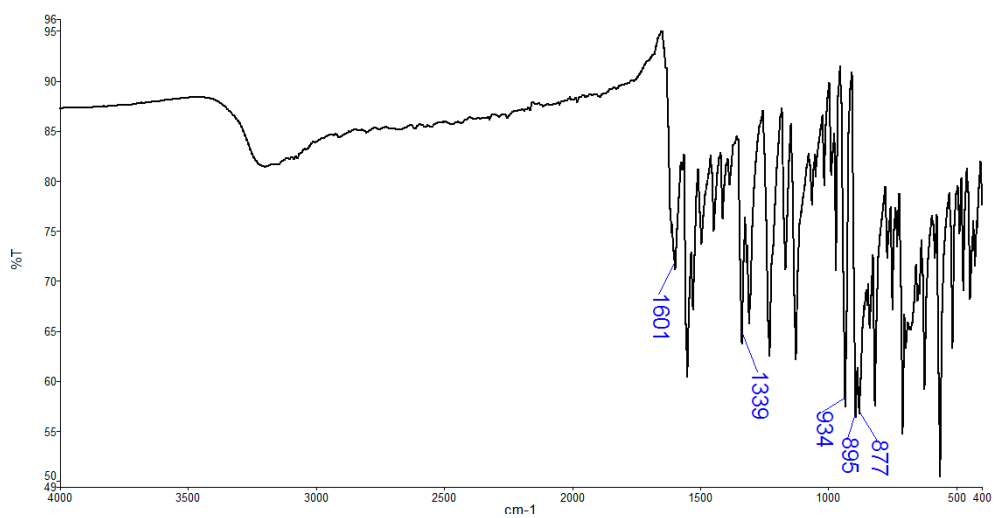

(c)

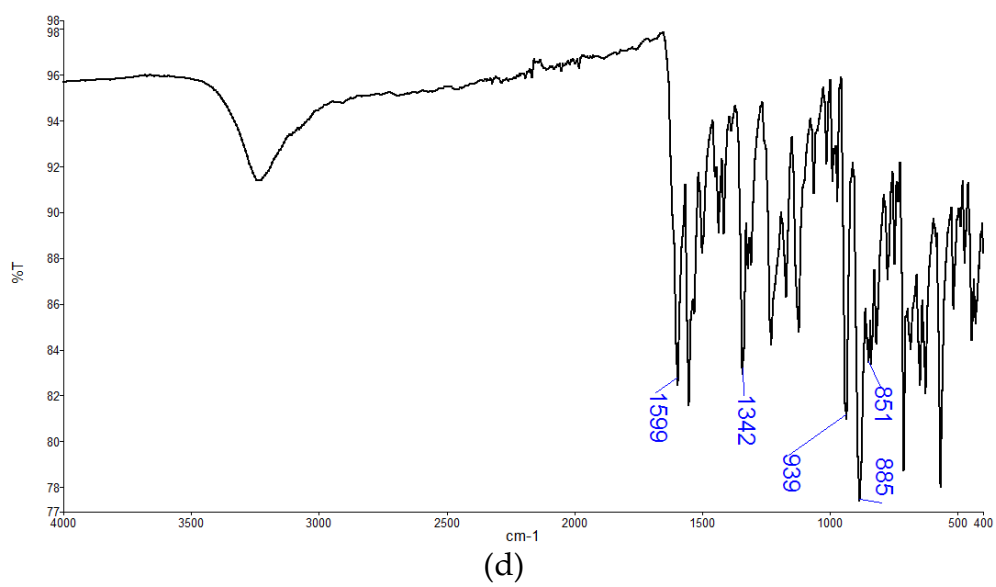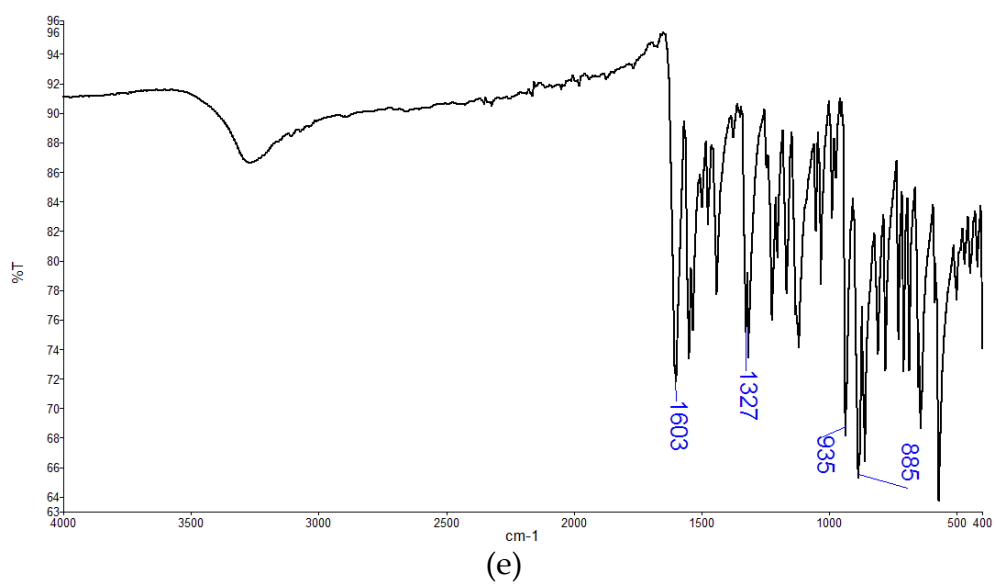

**Figure S1.** IR-ATR spectra of polymers (a) **1**, (b) **2**, (c) **3**, (d) **3·H<sub>2</sub>O**, and (e) **4**.

## IR-ATR spectra of $[\text{MoO}_2(\text{L}^{1-4})(\text{MeOH})]$

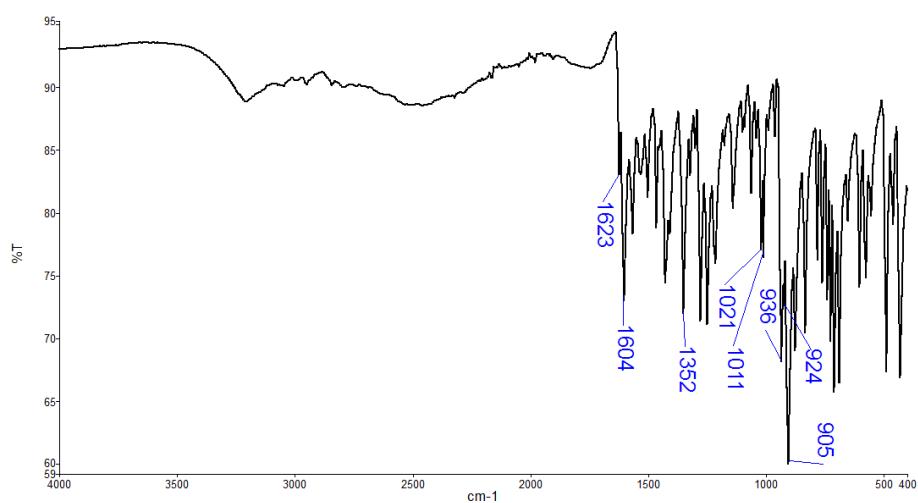

(a)

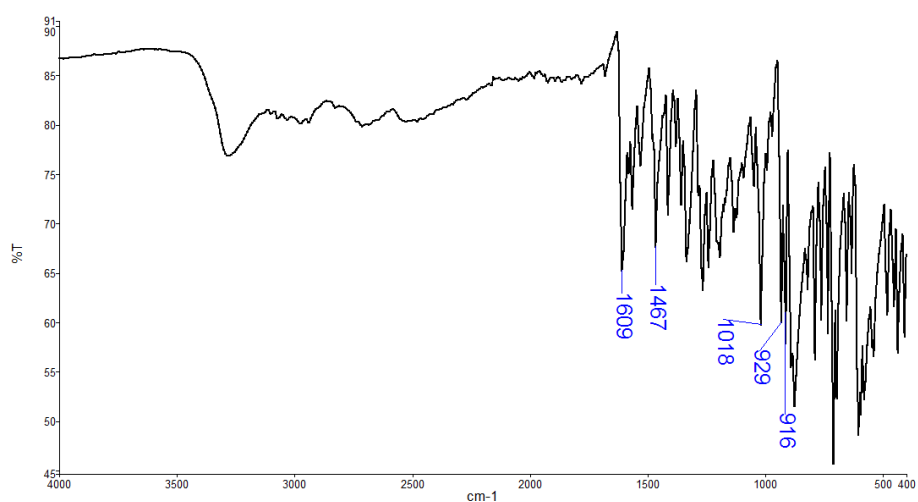

(b)

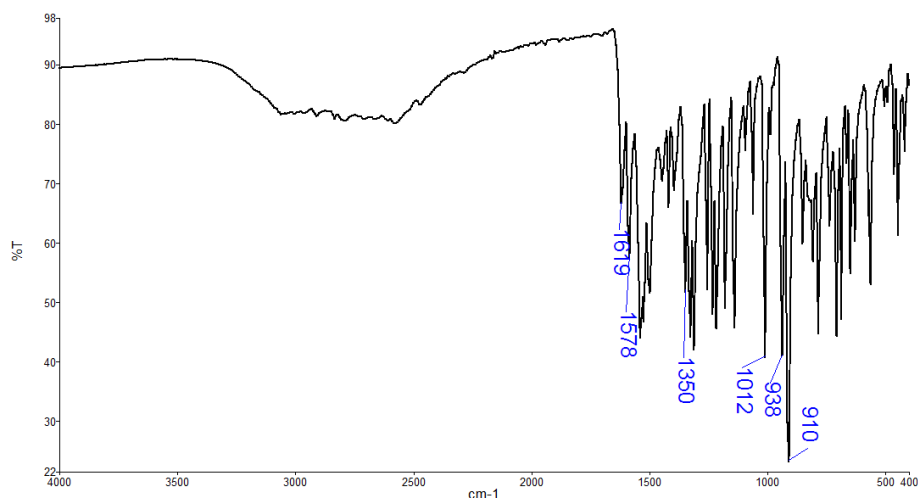

(c)

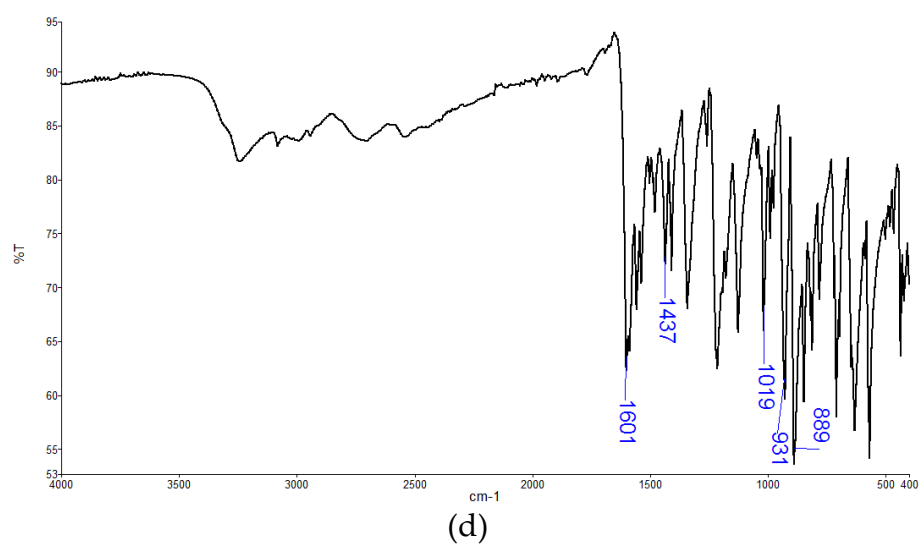

**Figure S2.** IR-ATR spectra of **1a**, **2a**, **3a** and **4a** (from top to bottom).

## NMR spectroscopy of $[\text{MoO}_2(\text{L})]_n$

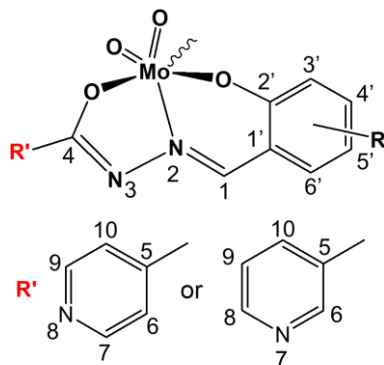

|       |   |   |
|-------|---|---|
| 3'-OH | 1 | 3 |
| 4'-OH | 2 | 4 |

The **Table S3**, **S4**, **Figure S1** and **S2** are according to the scheme and numeration used above.

**Table S3**  $^1\text{H}$  and  $^{13}\text{C}$  chemical shifts (ppm) of  $\text{H}_2\text{L}^1$ , **1**, and  $\text{H}_2\text{L}^2$  and **2**

|              | <b>H<sub>2</sub>L<sup>1</sup></b> |                                   | <b>1</b>                       |                                   | <b>H<sub>2</sub>L<sup>2</sup></b> |                                   | <b>2</b>                       |                                   |
|--------------|-----------------------------------|-----------------------------------|--------------------------------|-----------------------------------|-----------------------------------|-----------------------------------|--------------------------------|-----------------------------------|
| Atom         | $^1\text{H}$<br>$\delta$ / ppm    | $^{13}\text{C}$<br>$\delta$ / ppm | $^1\text{H}$<br>$\delta$ / ppm | $^{13}\text{C}$<br>$\delta$ / ppm | $^1\text{H}$<br>$\delta$ / ppm    | $^{13}\text{C}$<br>$\delta$ / ppm | $^1\text{H}$<br>$\delta$ / ppm | $^{13}\text{C}$<br>$\delta$ / ppm |
| <b>1</b>     | 8.65                              | 150.22                            | 8.97                           | 158.23                            | 8.54                              | 150.37                            | 8.85                           | 157.63                            |
| <b>4</b>     | –                                 | 161.77                            | –                              | 167.43                            | –                                 | 161.40                            | –                              | 165.87                            |
| <b>5</b>     | –                                 | 140.41                            | –                              | 138.05                            | –                                 | 140.60                            | –                              | 138.08                            |
| <b>6</b>     | 7.86                              | 121.98                            | 7.88                           | 121.99                            | 7.83                              | 121.92                            | 7.84                           | 121.81                            |
| <b>7</b>     | 8.81                              | 150.87                            | 8.77                           | 151.02                            | 8.79                              | 150.82                            | 8.74                           | 150.95                            |
| <b>8</b>     | –                                 | –                                 | –                              | –                                 | –                                 | –                                 | –                              | –                                 |
| <b>9</b>     | 8.81                              | 150.87                            | 8.77                           | 151.02                            | 8.79                              | 150.82                            | 8.74                           | 150.95                            |
| <b>10</b>    | 7.86                              | 121.98                            | 7.88                           | 121.99                            | 7.83                              | 121.92                            | 7.84                           | 121.81                            |
| <b>1'</b>    | –                                 | 119.27                            | –                              | 121.02                            | –                                 | 110.92                            | –                              | 112.83                            |
| <b>2'</b>    | –                                 | 146.65                            | –                              | 148.69                            | –                                 | 159.99                            | –                              | 162.01                            |
| <b>3'</b>    | –                                 | 146.12                            | –                              | 146.71                            | 6.34                              | 103.10                            | 6.33                           | 105.12                            |
| <b>4'</b>    | 6.89                              | 118.07                            | 7.10                           | 121.90                            | –                                 | 161.50                            | –                              | 165.34                            |
| <b>5'</b>    | 6.76                              | 119.72                            | 6.93                           | 122.38                            | 6.38                              | 108.33                            | 6.55                           | 111.04                            |
| <b>6'</b>    | 7.03                              | 120.27                            | 7.22                           | 125.15                            | 7.37                              | 131.66                            | 7.58                           | 136.77                            |
| <b>N–H</b>   | 12.31                             | –                                 | –                              | –                                 | 12.12                             | –                                 | –                              | –                                 |
| <b>2'–OH</b> | 10.86                             | –                                 | –                              | –                                 | 11.26                             | –                                 | –                              | –                                 |
| <b>3'–OH</b> | 9.31                              | –                                 | 9.51                           | –                                 | 10.01                             | –                                 | 10.71                          | –                                 |

**Table S4**  $^1\text{H}$  and  $^{13}\text{C}$  chemical shifts (ppm) of  $\text{H}_2\text{L}^3$ , **3**, and  $\text{H}_2\text{L}^4$  and **4**

| Atom         | $\text{H}_2\text{L}^3$         |                                   | <b>3</b>                       |                                   | $\text{H}_2\text{L}^4$         |                                   | <b>4</b>                       |                                   |
|--------------|--------------------------------|-----------------------------------|--------------------------------|-----------------------------------|--------------------------------|-----------------------------------|--------------------------------|-----------------------------------|
|              | $^1\text{H}$<br>$\delta$ / ppm | $^{13}\text{C}$<br>$\delta$ / ppm |
| <b>1</b>     | 8.62                           | 149.80                            | 8.94                           | 157.38                            | 8.52                           | 149.96                            | 8.82                           | 156.86                            |
| <b>4</b>     | –                              | 161.87                            | –                              | 167.52                            | –                              | 161.53                            | –                              | 165.97                            |
| <b>5</b>     | –                              | 129.13                            | –                              | 126.69                            | –                              | 129.30                            | –                              | 126.73                            |
| <b>6</b>     | 9.10                           | 149.09                            | 9.15                           | 149.20                            | 9.08                           | 149.01                            | 9.11                           | 149.00                            |
| <b>7</b>     | –                              | –                                 | –                              | –                                 | –                              | –                                 | –                              | –                                 |
| <b>8</b>     | 8.79                           | 152.94                            | 8.76                           | 152.79                            | 8.77                           | 152.77                            | 8.73                           | 152.50                            |
| <b>9</b>     | 7.59                           | 124.13                            | 7.57                           | 124.44                            | 7.58                           | 124.09                            | 7.54                           | 124.39                            |
| <b>10</b>    | 8.29                           | 135.94                            | 8.31                           | 135.85                            | 8.26                           | 135.83                            | 8.27                           | 135.61                            |
| <b>1'</b>    | –                              | 119.25                            | –                              | 121.09                            | –                              | 110.93                            | –                              | 112.88                            |
| <b>2'</b>    | –                              | 146.60                            | –                              | 148.56                            | –                              | 159.97                            | –                              | 161.85                            |
| <b>3'</b>    | –                              | 146.10                            | –                              | 146.68                            | 6.34                           | 103.11                            | 6.32                           | 105.10                            |
| <b>4'</b>    | 6.88                           | 117.99                            | 7.09                           | 121.66                            | –                              | 161.38                            | –                              | 165.07                            |
| <b>5'</b>    | 6.76                           | 119.69                            | 6.92                           | 122.32                            | 6.38                           | 108.27                            | 6.54                           | 110.94                            |
| <b>6'</b>    | 7.02                           | 120.36                            | 7.21                           | 124.99                            | 7.36                           | 131.71                            | 7.57                           | 136.55                            |
| <b>N–H</b>   | 12.26                          | –                                 | –                              | –                                 | 12.07                          | –                                 | –                              | –                                 |
| <b>2'–OH</b> | 10.96                          | –                                 | –                              | –                                 | 11.33                          | –                                 | –                              | –                                 |
| <b>3'–OH</b> | 9.29                           | –                                 | 9.49                           | –                                 | 10.00                          | –                                 | 10.66                          | –                                 |



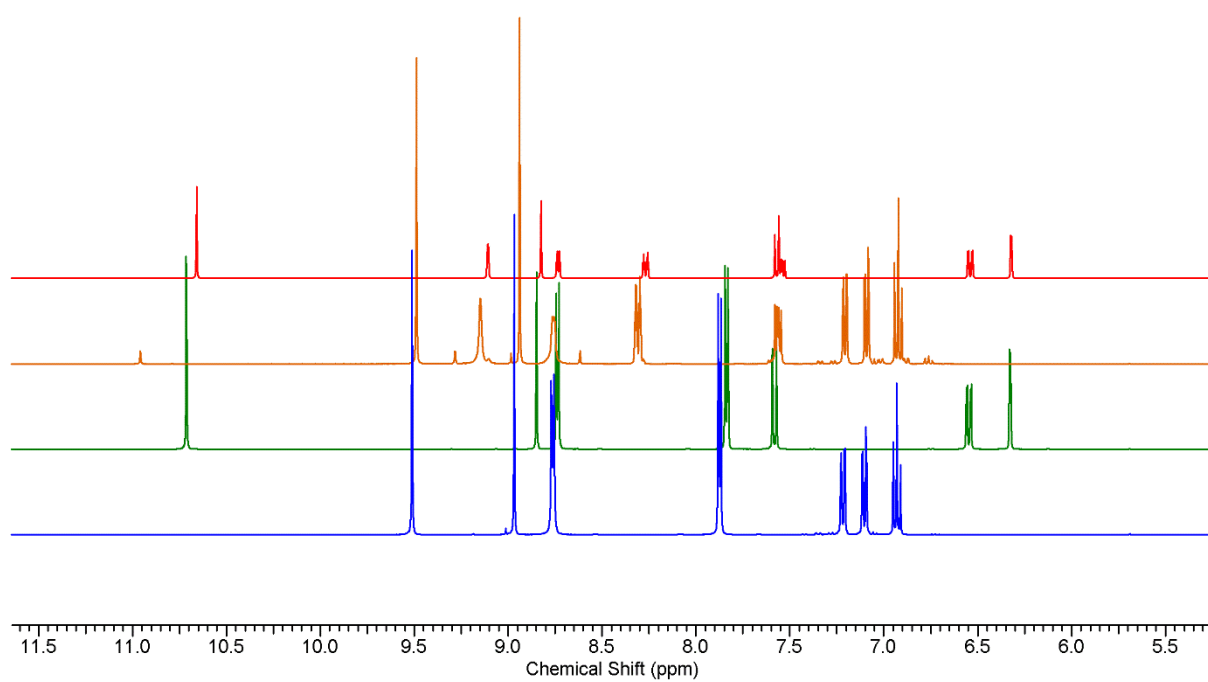

**Figure S1.**  $^1\text{H}$  NMR spectra of 1-4 in  $\text{dmso}-d_6$  (form botom to top).

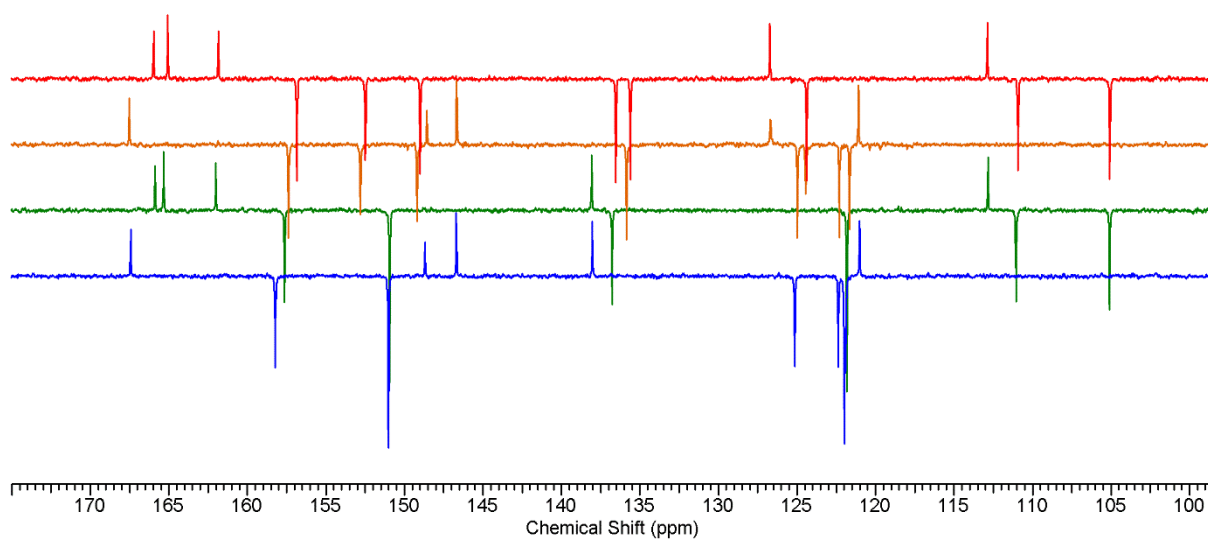

**Figure S2.**  $^{13}\text{C}$  NMR spectra of 1-4 in  $\text{dmso}-d_6$  (form botom to top).

## Visual presentation of catalytic results

Carveol oxidation with  $\text{H}_2\text{O}_2$

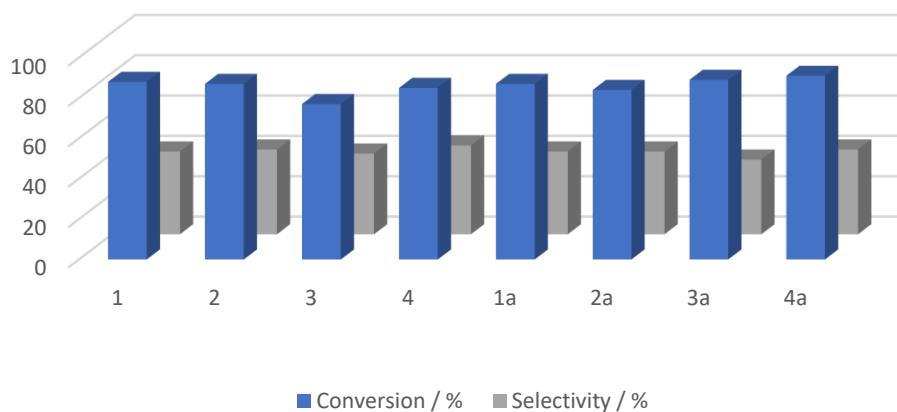

Carveol oxidation with TBHP in water

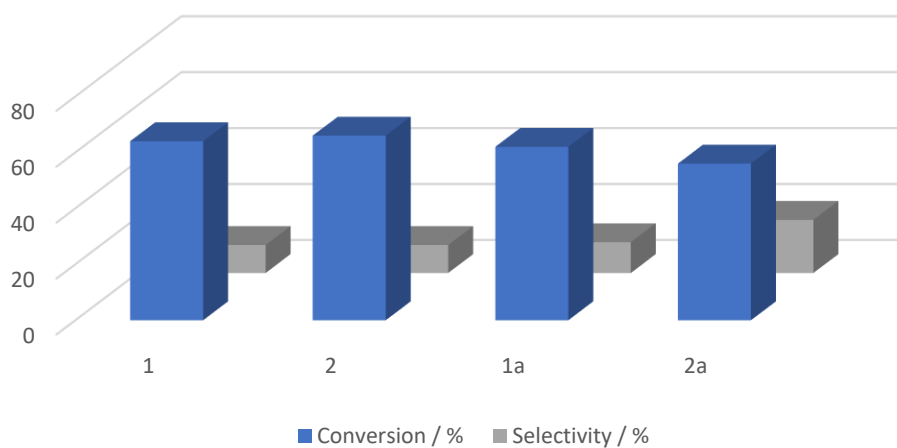

Cyclohexanol oxidation with different oxidants

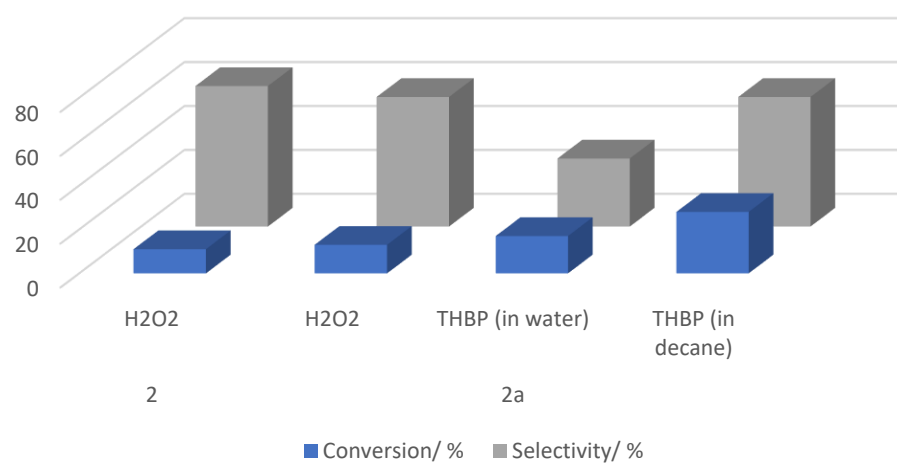

## Cyclohexanol oxidation with H<sub>2</sub>O<sub>2</sub>

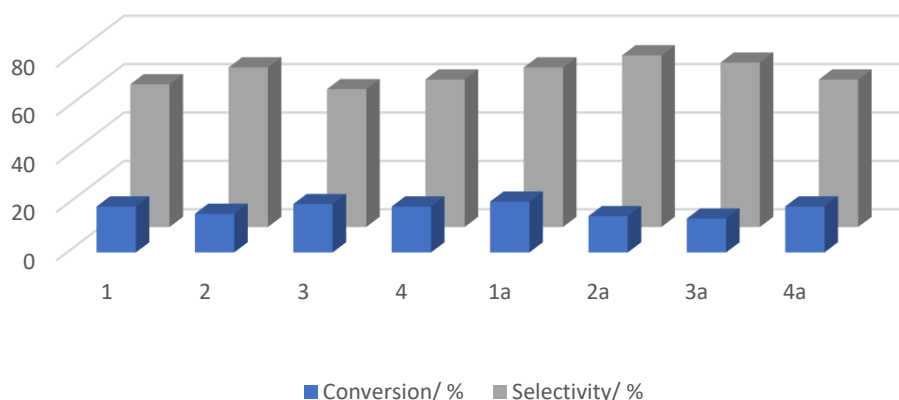

## Butan-2-ol oxidation with different oxidants

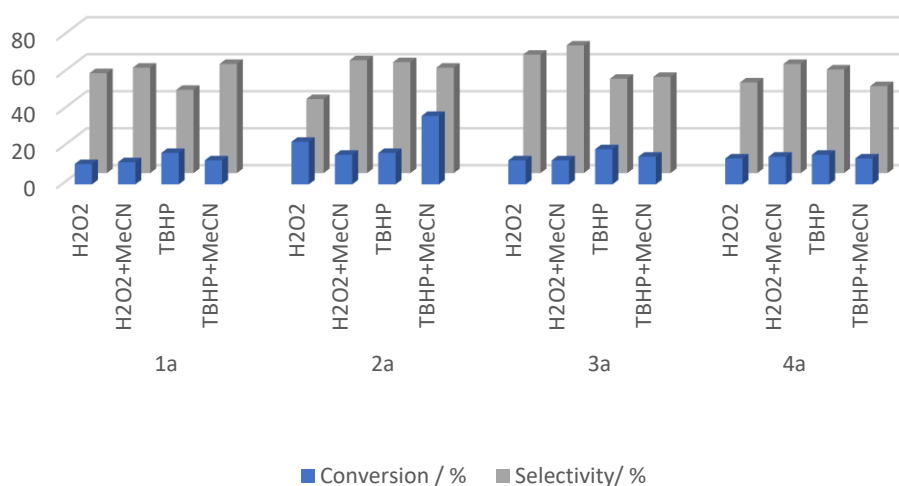

## Carveol oxidation – discussion part

GC and NMR spectra indicated more than two by-products in all types of reaction. In order to identify by-products, several experiments were performed. After purification of the reaction mixtures with H<sub>2</sub>O<sub>2</sub> and aqueous TBHP by column chromatography<sup>1</sup>, the obtained fractions were analyzed by GC-MS, NMR, and GC. Even with those methods, it was not possible to identify the unknown product **A** with certainty. In GC-MS experiment the product **A** was identified as limonene diepoxide, but the presence was not confirmed in the NMR

<sup>1</sup>Conditions for CC: Stationary phase: silica gel. Mobile phase: 250 mL of the mixtures of hexane and diethyl ether with different polarities (diethyl ether content: 5 %, 10 %, 10 %, 30 %, 50 %, 100 %). The composition of the eluent flow was monitored with TLC and visualized with UV lamp, iodine or permanganate.

spectra. Besides, the fraction in which product **A** was isolated was contaminated with other by-products and due to overlapping of the NMR signals, no identification was possible. GC-MS spectral data additionally confirmed the previously assumed stereoselectivity of the reaction towards *cis*-carveol in the case of H<sub>2</sub>O<sub>2</sub> and towards *trans*-carveol in the case of aqueous THBP.
